# Supplementary material for: Kinetic Estimated Glomerular Filtration Rate in Predicting Paediatric Acute Kidney Disease
Source: Preprints.org preprint supplement (doi:10.20944/preprints202309.0228.v1), 2023-09-06
Supplement: Supplementary file 2 [file supplementary]

**Supplementary Table S1.** Logistic regression with AKD and MAKE30 dependant variable with KeGFR1 stages.

| **Parameter** | **AKD** | **AKD adjusted** | **MAKE30** | **MAKE30 adjusted** |
| --- | --- | --- | --- | --- |
| KGFR1 stage 1 | Baseline | Baseline | Baseline | Baseline |
| KGFR1 stage 2 | - | - | - | - |
| KGFR1 stage 3 | 2.76 (1.64-4.64) | 3.07 (1.74-5.39) | - | - |
| KGFR1 stage 4 | 5.33 (3.44-8.28) | 6.56 (3.92-10.98) | - | - |
| KGFR1 stage 5 | 27.23 (15.11-49.07) | 28.07 (14.23-55.34) | 10.42 (6.41-16.93) | 7.77 (4.53-13.32) |
| Nagelkerke R2 | 0.27 | 0.32 | 0.18 | 0.23 |
| AUC | 0.763 | 0.801 | 0.675 | 0.764 |

Legend: Adjusted for: sex, AKI stage, AKI cause; AKD=acute kidney disease; MAKE30=major adverse kidney events in the first 30 days; KeGFR=kinetic estimated glomerular filtration rate; AUC=area under the curve.

**Supplementary Table S2.** Logistic regression with AKD and MAKE30 dependant variable with KeGFR2 stages.

| **Parameter** | **AKD** | **AKD adjusted** | **MAKE30** | **MAKE30 adjusted** |
| --- | --- | --- | --- | --- |
| KGFR2 stage 1 | Baseline | Baseline | Baseline | Baseline |
| KGFR2 stage 2 | 2.65 (1.18-5.94) | 2.79 (1.23-6.33) | - | - |
| KGFR2 stage 3 | 3.03 (1.53-6) | 3.58 (1.76-7.29) | 2.8 (1.1-7.09) | 4.23 (1.56-15.02) |
| KGFR2 stage 4 | 28.72 (10.46-78.85) | 32.75 (11.7-91.68) | 4.48 (1.86-10.81) | 5.89 (2.31-15.02) |
| KGFR2 stage 5 | 70.09 (16.04-306.29) | 80.14 (18.08-355.11) | 43.17 (17.21-108.26) | 69.42 (24.84-193.97) |
| Nagelkerke R2 | 0.43 | 0.44 | 0.37 | 0.43 |
| AUC | 0.809 | 0.827 | 0.809 | 0.837 |

Legend: Adjusted for: sex, AKI stage, AKI cause; AKD=acute kidney disease; MAKE30=major adverse kidney events in the first 30 days; KeGFR=kinetic estimated glomerular filtration rate; AUC=area under the curve.
